# Supplementary material for: Inhibition of glycogen synthase kinase-3-beta (GSK3β) blocks nucleocapsid phosphorylation and SARS-CoV-2 replication
Source: Research Square preprint supplement (doi:10.21203/rs.3.rs-1197371/v1), 2022-01-07
Supplement: Supplementary file 1 [file 60f0b15b7de7660a8dc7194b.xlsx]

## Sheet: Sheet1
	Takeda ID	Cell loss (%)		HCoV-229E inhibition (% dsRNA)	Average SARS-CoV-2 inhibitions	SARS-CoV-2 inhibition (% Nucleocapsid) 1	SARS-CoV-2 inhibition (% Nucleocapsid) 2	SARS-CoV-2 inhibition (% dsRNA)		Δ dsRNA-NC
			Z'	0.679609	0.641037	0.740545	0.541528	0.335626
1	P-0181532	15.4738		0	38.2039	49.9699	26.4379	47.5554		9.35147
2	P-0388342	20.7478		0	14.9219	21.7205	8.12338	23.1206		8.19868
3	P-0717632	24.3768		97.6111	79.2551	75.1699	83.3404	68.2179		11.0372
4	P-0766122	34.0892		0	15.8282	11.668	19.9884	30.3488		14.5206
5	P-0780332	9.19745		0	0	0	0	0.639048		0.639048
6	P-0817042	0		0	15.6587	0	31.3175	0		15.6587
7	P-0861532	25.0428		0	29.5087	18.5479	40.4696	36.491		6.98228
8	P-0866122	32.0777		0	31.9409	46.6538	17.2281	48.8621		16.9212
9	P-0993232	13.5643		0	1.02682	0	2.05364	0		1.02682
10	P-1071942	15.7465		43.8789	0	0	0	0		0
11	P-1112942	9.17816		10.7689	19.0107	9.47322	28.5482	0		19.0107
12	P-1299432	9.88553		0	10.5515	0	21.1031	0		10.5515
13	P-1312942	22.5092		0	0	0	0	0		0
14	P-1517932	16.6505		0	25.8359	13.8796	37.7921	26.1649		0.329029
15	P-1756242	13.8771		0	0	0	0	20.1156		20.1156
16	P-1766122	27.6792		77.0273	1.70348	0	3.40695	0		1.70348
17	P-1996542	0		0	0	0	0	0		0
18	P-2180632	32.978		75.8702	4.60949	9.21898	0	19.02		14.4105
19	P-2253942	25.3453		98.0347	42.2377	47.7867	36.6887	68.8858		26.6481
20	P-2405532	5.81493		0	0	0	0	0		0
21	P-2432522	20.9591		96.1086	46.5457	35.787	57.3043	36.421		10.1246
22	P-2517632	3.68419		0	2.06	4.12	0	23.44		21.38
23	P-2719981	64.287		0	0	0	0	0		0
24	P-2792732	17.7181		0	4.23457	0	8.46914	5.0904		0.855829
25	P-2817632	8.52866		14.8951	16.1329	0	32.2659	21.0718		4.93883
26	P-2889432	20.2668		0	53.8908	61.158	46.6235	79.4507		25.5599
27	P-2966122	22.9784		0	21.8979	0.562843	43.233	19.0952		2.80275
28	P-3517632	10.908		0	16.456	5.19473	27.7172	0		16.456
29	P-3772732	35.9522		30.7482	4.14763	0	8.29527	13.1208		8.97316
30	P-3817632	12.6571		87.736	71.392	70.8249	71.9591	100		28.608
31	P-3866122	40.0582		0	2.09235	0	4.1847	11.0978		9.00542
32	P-3890332	9.60259		0.034075	0	0	0	7.50238		7.50238
33	P-4086132	8.38076		14.0889	7.80344	4.3902	11.2167	27.4491		19.6457
34	P-4179332	12.3356		7.93971	9.3845	0	18.769	0		9.3845
35	P-4380332	13.7825		85.4247	24.1952	0	48.3904	23.6782		0.516969
36	P-4405532	14.832		21.1552	19.9282	0	39.8564	0		19.9282
37	P-4423632	11.9691		43.1934	95.2062	98.0313	92.3812	100		4.79375
38	P-4817632	8.27285		0	0.95225	1.9045	0	43.2488		42.2966
39	P-4890332	17.8479		0	11.2187	22.4373	0	37.4817		26.263
40	P-4993232	0		0	4.52734	0	9.05468	1.08492		3.44243
41	P-5112942	32.0801		0	19.7782	19.8387	19.7178	13.4002		6.37807
42	P-5201042	28.9772		0	20.6978	0	41.3957	10.365		10.3328
43	P-5266942	13.9884		94.3215	25.7792	0	51.5584	0		25.7792
44	P-5283532	0		0	0	0	0	16.3169		16.3169
45	P-5536732	3.98862		0	17.9673	23.5262	12.4084	35.6625		17.6952
46	P-5603902	60.8309		0	7.97022	0	15.9404	0		7.97022
47	P-5694332	8.83091		0.77034	6.10252	0	12.205	0		6.10252
48	P-5704332	8.21479		95.5565	36.0084	17.7562	54.2606	26.6581		9.35025
49	P-5782442	16.1318		59.9742	93.8272	93.2509	94.4035	100		6.17278
50	P-5817632	2.36706		39.3392	23.9512	0	47.9023	24.3568		0.405646
51	P-5866122	34.3503		0	7.41019	0	14.8204	12.6243		5.21407
52	P-5868332	14.9024		12.3279	6.85867	12.5721	1.1452	8.02467		1.16601
53	P-5908342	21.6713		91.4751	62.2078	76.0422	48.3734	60.5004		1.70744
54	P-6378522	11.3131		76.2236	32.4646	21.127	43.8022	18.4811		13.9835
55	P-6579432	10.4765		36.174	13.6138	0	27.2276	11.5907		2.02307
56	P-6600632	12.2777		0	17.2378	20.4774	13.9981	12.5843		4.65341
57	P-6694332	12.0928		0	6.52308	0	13.0462	21.558		15.0349
58	P-6849132	23.9044		91.0797	29.1252	7.46195	50.7884	35.2371		6.11189
59	P-6866122	41.7576		0	28.1719	27.9409	28.403	44.5489		16.3769
60	P-6868332	18.7416		0	0	0	0	0		0
61	P-7079522	19.6859		17.4967	16.3297	8.14011	24.5192	0		16.3297
62	P-7284532	7.50755		36.8154	0	0	0	0		0
63	P-7657632	25.3963		100	93.115	100	86.2301	100		6.88495
64	P-7694332	9.05598		0	0	0	0	0		0
65	P-7833142	31.9105		2.94603	14.2866	0	28.5732	0		14.2866
66	P-7933732	9.2489		46.1605	4.18342	6.71278	1.65406	20.2979		16.1145
67	P-8060932	26.6655		0	10.2102	0	20.4204	12.1099		1.89966
68	P-8405242	24.8883		95.7121	1.42796	0	2.85592	5.52654		4.09858
69	P-8431332	14.5106		0	7.07503	14.1501	0	0		7.07503
70	P-8536732	13.6067		37.6366	3.89246	0.681756	7.10317	0		3.89246
71	P-8602232	27.0834		0	2.48823	0	4.97646	0		2.48823
72	P-8733142	45.5974		0	0	0	0	16.0004		16.0004
73	P-8866122	33.885		0	24.88	0	49.76	16.6111		8.26896
74	P-8890332	17.06		33.6779	18.0277	12.772	23.2835	0		18.0277
75	P-9071942	29.9235		94.1805	94.5415	100	89.0829	100		5.45853
76	P-9101042	7.80415		68.2518	24.1191	34.7163	13.5219	25.1028		0.983688
77	P-9227932	16.5933		98.1796	40.2062	47.2878	33.1247	54.0591		13.8528
78	P-9332522	27.9643		76.121	21.0766	0	42.1532	0		21.0766
79	P-9431332	5.53198		0	4.09585	8.19169	0	7.79477		3.69892
80	P-9657632	33.9105		0	33.3067	22.9637	43.6497	53.7186		20.4119
81	P-9817632	17.7888		41.4756	4.32302	0	8.64604	0		4.32302
82	P-9866122	12.3678		97.2815	21.8706	0	43.7411	40.835		18.9644
83	P-9958042	15.3066		0	8.12188	2.13177	14.112	0		8.12188
									Average	9.93514
									SD	8.60752
